# Supplementary material
Source: Springer Nature journal article supplement (https://www.springermedizin.de/resource/supplementary/12955_2010_800_MOESM1_ESM.pdf/9561286)

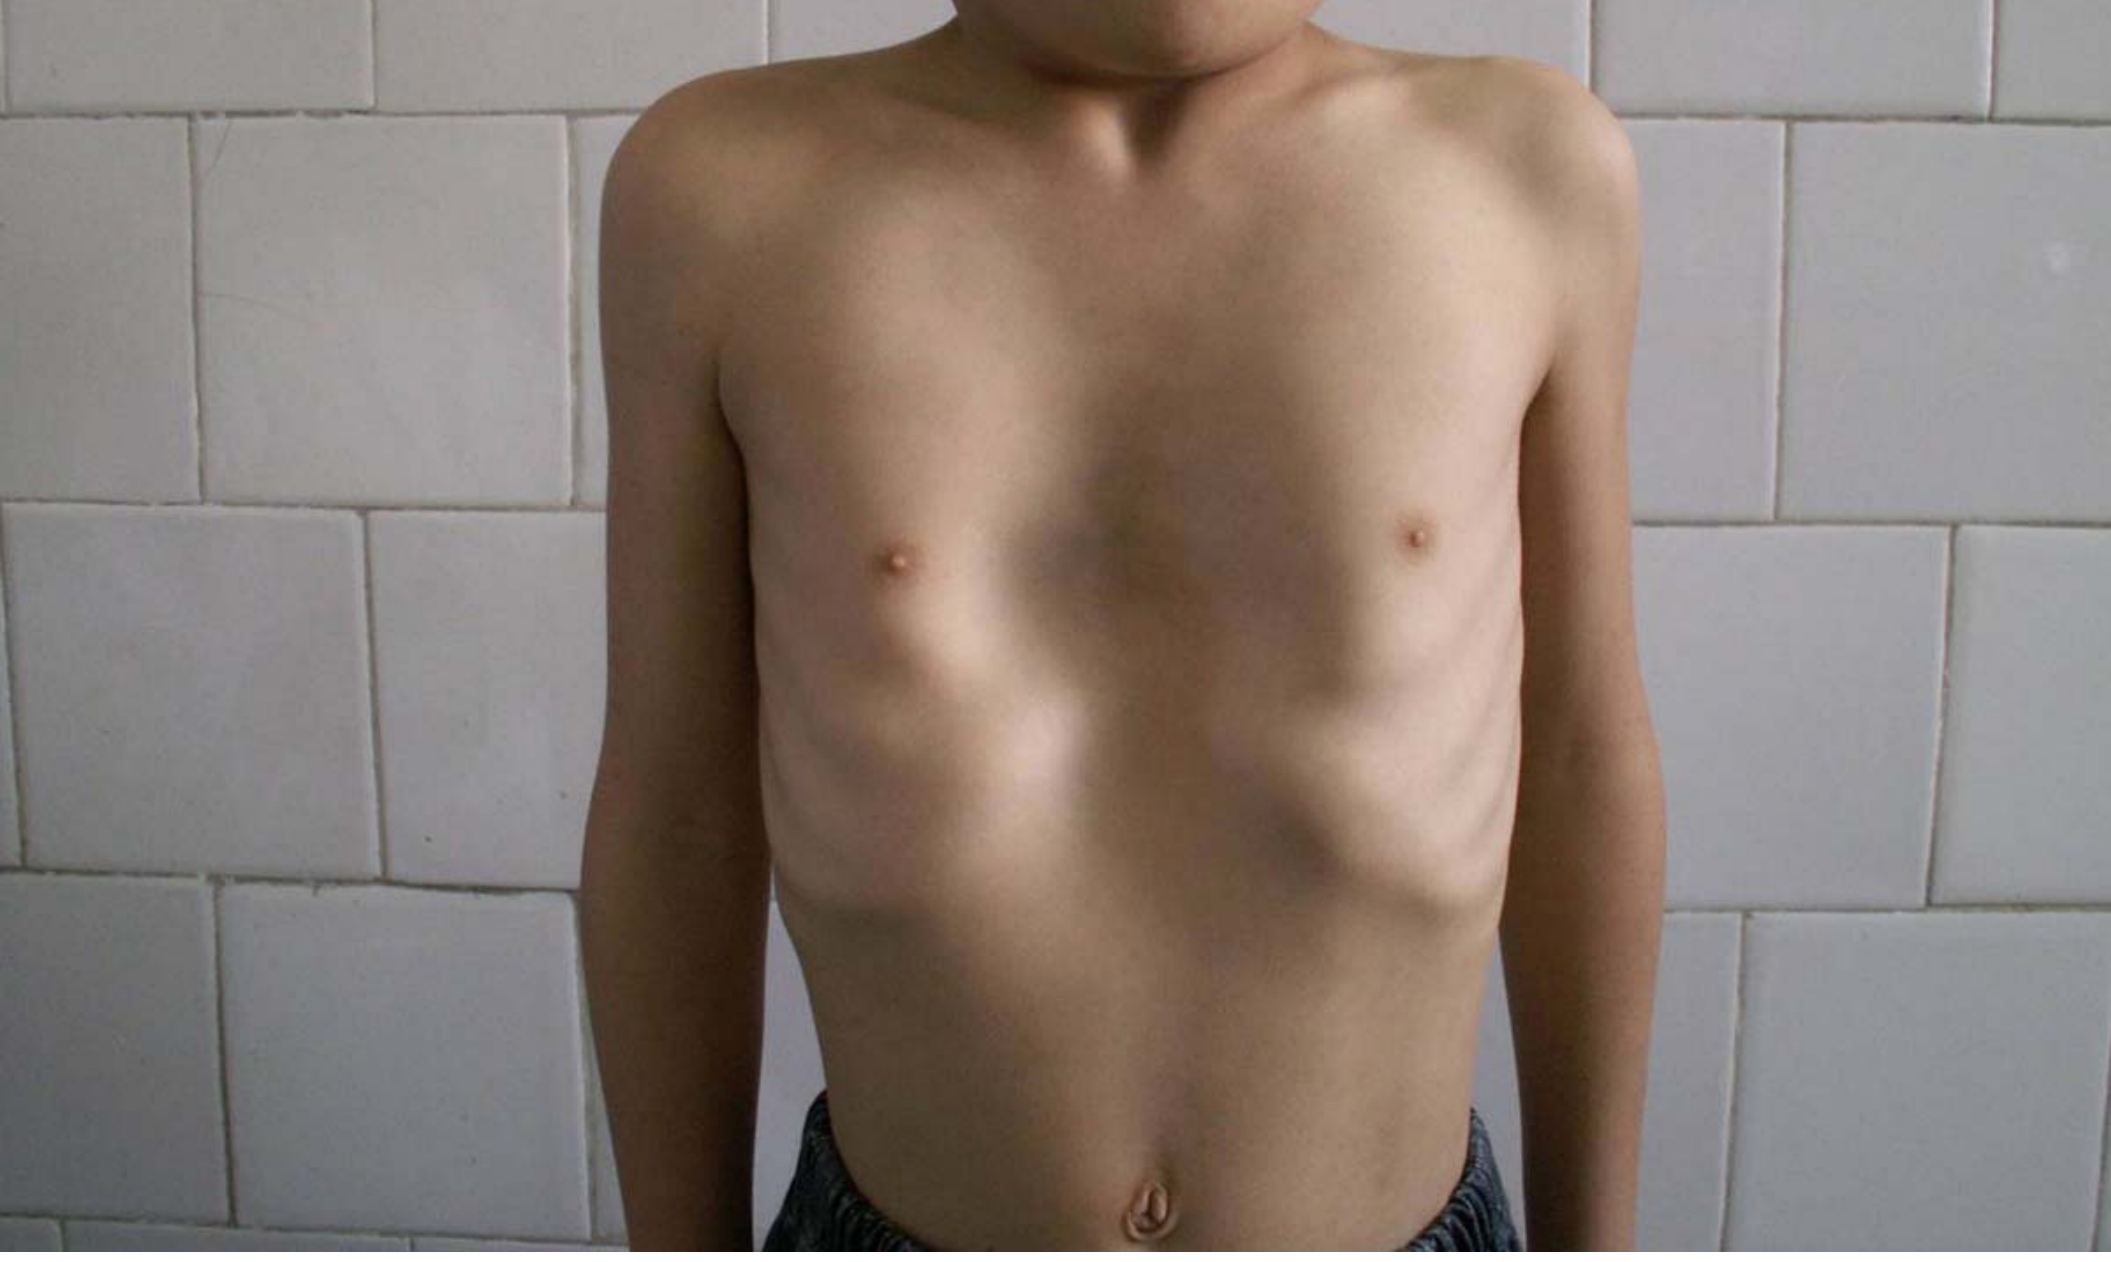

Supplement: MOESM1 [file 9561286]
